# Supplementary material
Source: PubMed Central journal article supplement (PMC2878077)

**Supplemental Figure 1 : Insulin and IGF-1 stimulated gene expression in WT, IGFRKO and IRKO cells**

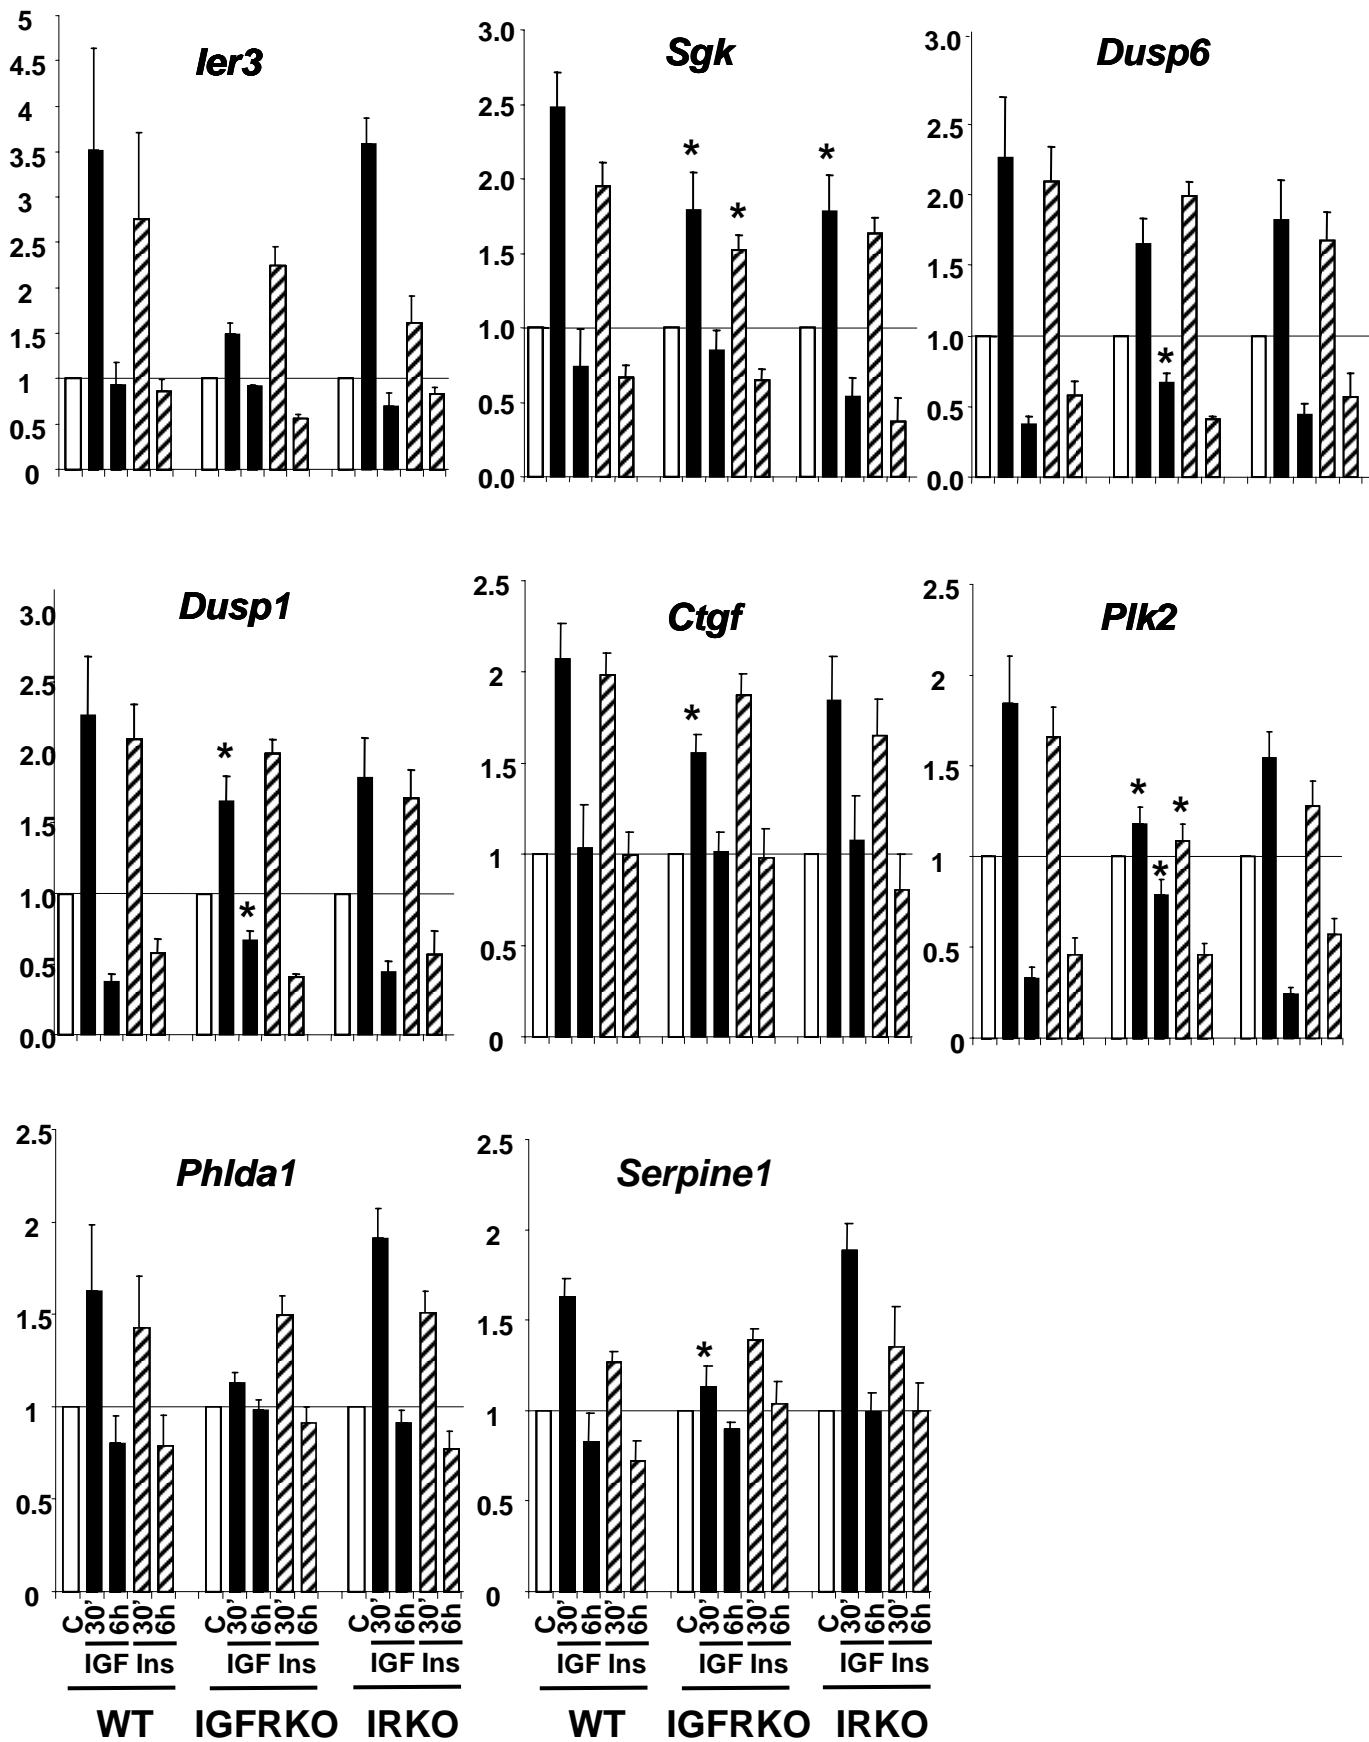

**Supplemental Figure 2 : Insulin and IGF-1 stimulated gene expression in WT, IGFRKO and IRKO cells at 6 hours**

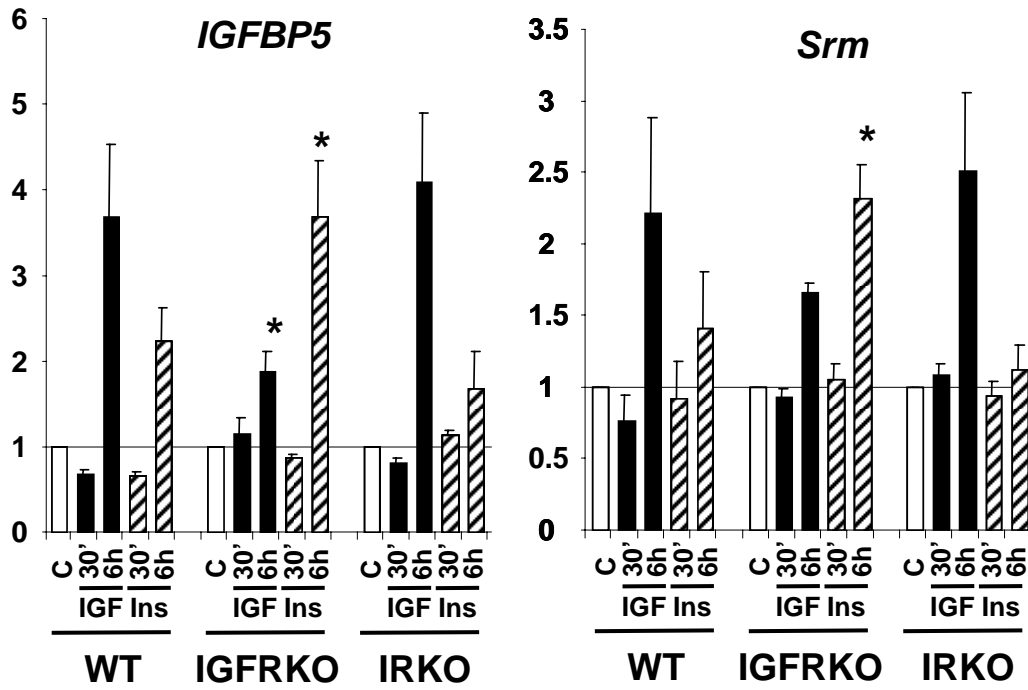

Supplement: supp_M110.118620_jbc.M110.118620-2.pdf [file supp_M110.118620_jbc.M110.118620-2.pdf]
